# Supplementary material for: Heme oxygenase-1 induction attenuates imiquimod-induced psoriasiform inflammation by negative regulation of Stat3 signaling
Source: PubMed Central journal article supplement (PMC4759695; doi:10.1038/srep21132), 2016-02-19
Supplement: srep21132-s1.pdf [file srep21132-s1.pdf]

## Supplementary information

### **Heme oxygenase-1 induction attenuates imiquimod-induced psoriasiform inflammation by negative regulation of Stat3 signaling**

Bin Zhang<sup>1,4</sup>, Sijing Xie<sup>1,5</sup>, Zhonglan Su<sup>2</sup>, Shiyu Song<sup>1</sup>, Hui Xu<sup>1</sup>, Gang Chen<sup>3</sup>,  
Wangsen Cao<sup>1</sup>, Shasha Yin<sup>1</sup>, Qian Gao<sup>1\*</sup> and Hongwei Wang<sup>1\*</sup>

<sup>1</sup>Center for Translational Medicine and Jiangsu Key Laboratory of Molecular Medicine, Medical School of Nanjing University, Nanjing, Jiangsu, 210093, China.

<sup>2</sup>Department of Dermatology, the First Affiliated Hospital of Nanjing Medical University, Nanjing, Jiangsu, 210029, China.

<sup>3</sup>Department of Esthetic Plastic Surgery, The First Affiliated Hospital of Nanjing University of TCM, Nanjing, Jiangsu, 210029, China.

<sup>4</sup>Central Laboratory, Nanjing Chest Hospital, Medical School of Southeast University, Nanjing, Jiangsu, 210029, China.

<sup>5</sup>Nanjing Stomatology Hospital, Medical School of Nanjing University, Nanjing, Jiangsu, 210093, China.

**\* Corresponding author: Hongwei Wang and Qian Gao**

Center for Translational Medicine and Jiangsu Key Laboratory of Molecular Medicine, Medical School of Nanjing University, Nanjing, Jiangsu, 210093, China. E-mail: hwang@nju.edu.cn; qian\_gao@nju.edu.cn

Tel: +86 25 83594755; Fax: ++86 25 83594755

**Supplementary information includes five figures.**

### **Supplementary Figure Legends**

**Supplementary Figure 1.** HO-1 activation in HaCaT cells inhibits Th17 cytokine-induced Stat3 phosphorylation and downstream gene expression. Full scan images of immunoblots for main figures.

**Supplementary Figure 2.** Altered HO-1 expression levels by recombinant expression or RNAi also influence Stat3 activation in keratinocytes. Full scan images of immunoblots for main figures.

**Supplementary Figure 3.** HO-1-induced Stat3 inactivation is mediated by SHP-1. Full scan images of immunoblots for main figures.

**Supplementary Figure 4.** HO-1 inhibited Stat3 activation in normal human keratinocyte through SHP-1 expression. Full scan images of immunoblots for main figures.

**Supplementary Figure 5.** Therapeutic effect of HO-1 activators on the IMQ-induced psoriasis mouse model. Full scan images of immunoblots for main figures.

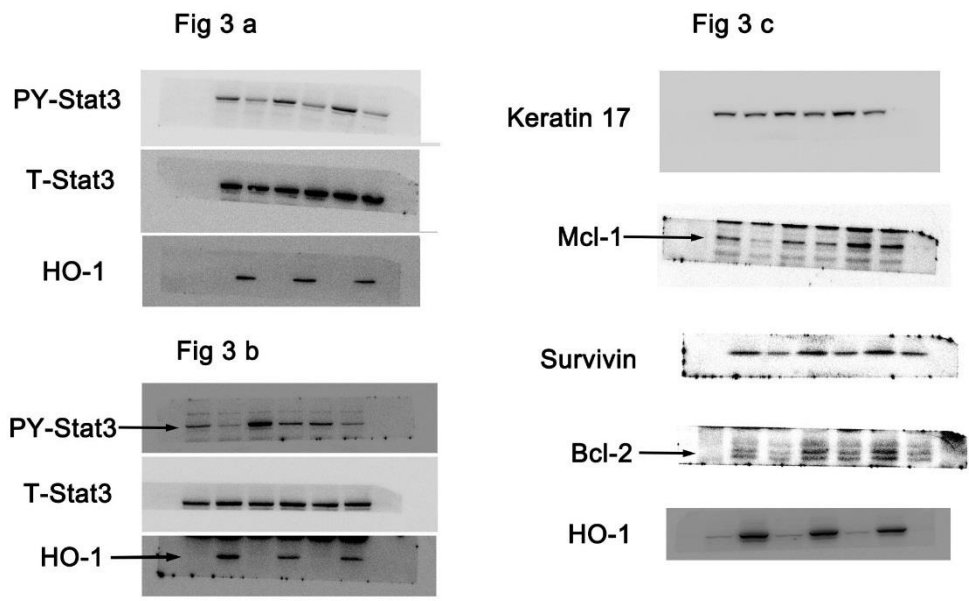

**Supplementary Figure 1**

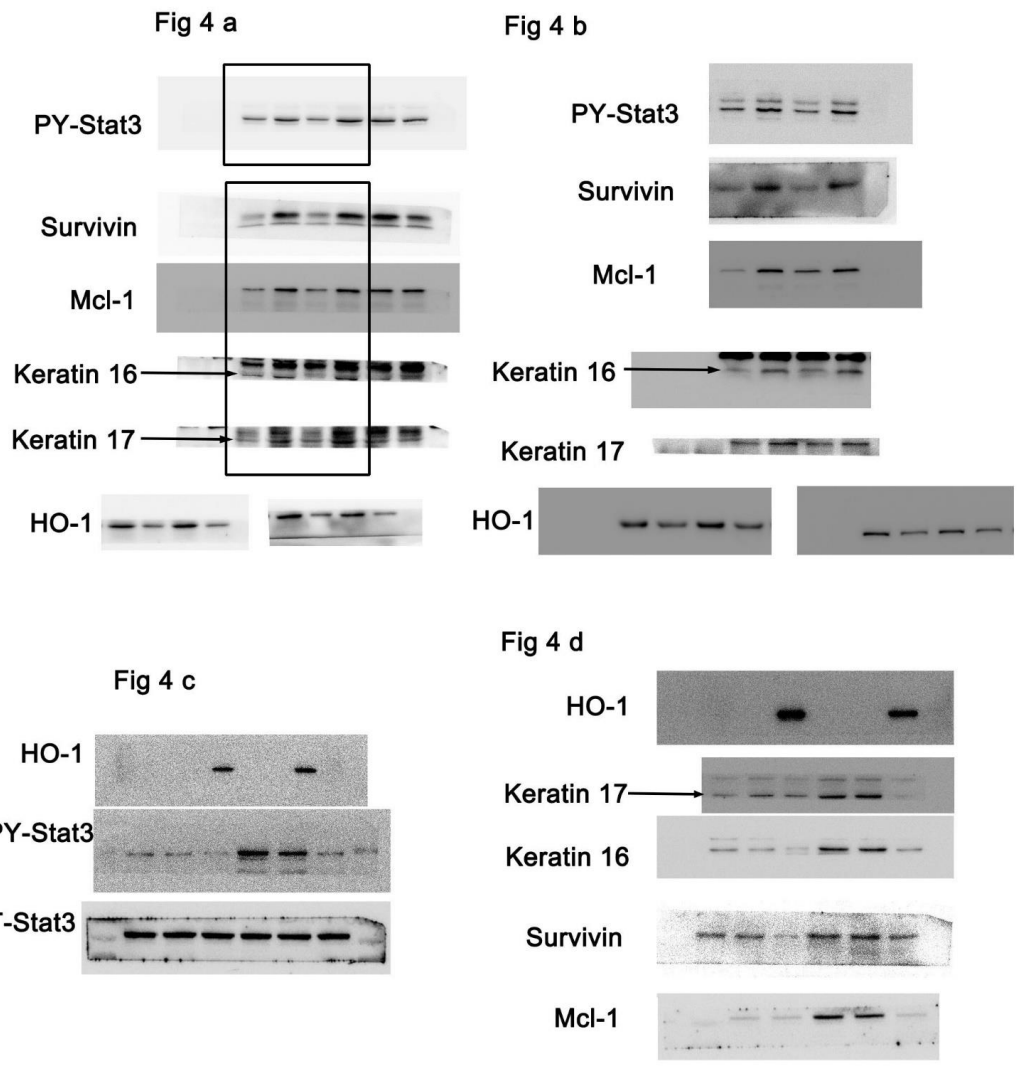

**Supplementary Figure 2**

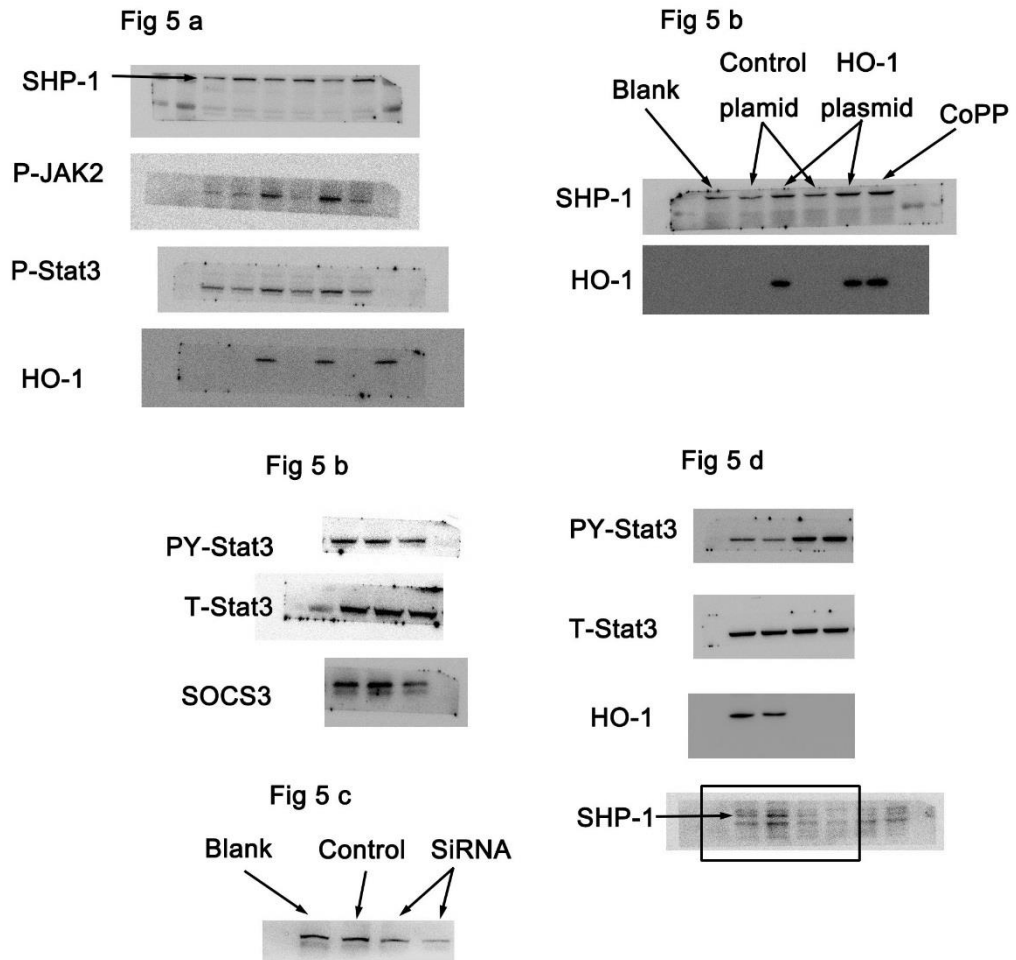

**Supplementary Figure 3**

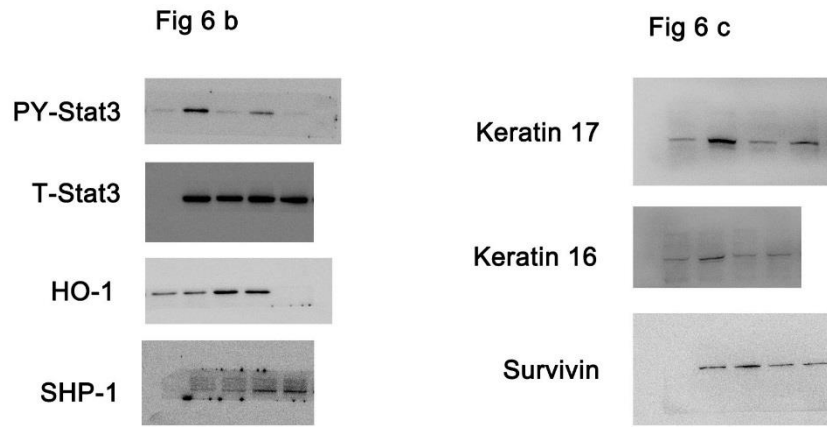

**Supplementary Figure 4**

Fig 7 c

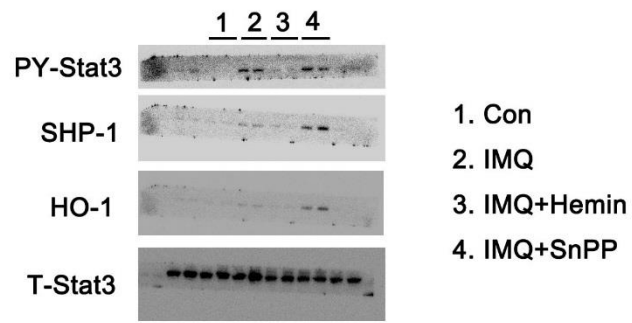

Supplementary Figure 5
